# Supplementary material
Source: HighWire-hosted journal article supplement (https://bjgpopen.org/highwire/filestream/5363/field_highwire_adjunct_files/0/K_10.3399BJGPO.2022.0036_supp.pdf)

## **Patient Experience Questionnaire**

*Please circle one answer for each question*

1. Have you had a rigid sigmoidoscopy performed before?

Yes / No

- a. If so, how does your experience of LumenEye compare to your previous rigid sigmoidoscopy?

Much worse / Worse / The Same / Better / Much Better

2. I was very anxious about having the examination

Strongly disagree / Disagree / Neutral / Agree / Strongly agree

3. The LumenEye examination was more comfortable than expected.

Strongly disagree / Disagree / Neutral / Agree / Strongly agree

4. Please indicate by marking the line below with an 'X' how comfortable/uncomfortable you found the procedure

Comfortable |-----| Uncomfortable

5. I felt embarrassed/awkward during the procedure

Strongly disagree / Disagree / Neutral / Agree / Strongly agree

6. My doctor was gentle during the LumenEye examination

Strongly disagree / Disagree / Neutral / Agree / Strongly agree

7. I felt I had enough privacy when the LumenEye examination was performed

Strongly disagree / Disagree / Neutral / Agree / Strongly agree

8. Having a LumenEye examination in the community is more convenient than going to hospital for an endoscopy

Strongly disagree / Disagree / Neutral / Agree / Strongly agree

9. Given the option, would you rather have future investigations:

In the community / In hospital / No preference

10. I feel that there is a benefit from having early specialist review of the images from your LumenEye assessment before being seen in the hospital

Strongly disagree / Disagree / Neutral / Agree / Strongly agree

11. I am comfortable having images from my LumenEye examination shared with a specialist in the hospital

Strongly disagree / Disagree / Neutral / Agree / Strongly agree

12. I find it reassuring that my images have been reviewed by a specialist whilst awaiting an appointment in the hospital

Strongly disagree / Disagree / Neutral / Agree / Strongly agree

13. From my perspective, the LumenEye examination was necessary and could benefit my health

Strongly disagree / Disagree / Neutral / Agree / Strongly agree

14. If needed, I would be willing to undergo a further examination with a LumenEye in future

Strongly disagree / Disagree / Neutral / Agree / Strongly agree

15. What is your overall opinion of your experience with LumenEye assessment?

Very poor / Poor / Neutral / Positive / Very positive

**Thank you for your time**

LuCID Study  
Case Report Form

**Patients demographics**

|                                                                   |                    |                                       |                             |
|-------------------------------------------------------------------|--------------------|---------------------------------------|-----------------------------|
| Patient Identifier: _____                                         |                    | Setting: _____ (inpatient/outpatient) |                             |
| Age: _____                                                        | Site: _____        | Sex (M/F): _____                      |                             |
| GP Name: _____                                                    | Contra-indications | Yes <input type="checkbox"/>          | No <input type="checkbox"/> |
| Consent: Yes <input type="checkbox"/> No <input type="checkbox"/> |                    |                                       |                             |
| Symptoms: __                                                      |                    |                                       |                             |
| Established diagnosis Of IBD                                      | Yes                | No                                    | (Crohns or UC )             |
| Rectal Bleeding                                                   | Yes                | No                                    |                             |
| Altered bowel habit                                               | Yes                | No                                    |                             |
| Mucus discharge                                                   | Yes                | No                                    |                             |
| Proctalgia                                                        | Yes                | No                                    |                             |
| Pruritis Ani                                                      | Yes                | No                                    |                             |
| Known Haemorrhoids                                                | Yes                | No                                    |                             |
| Mass or prolapse                                                  | Yes                | No                                    |                             |
| Family history of cancer                                          | Yes                | No                                    |                             |
| Other symptoms:                                                   |                    |                                       |                             |
| _____                                                             |                    |                                       |                             |
| _____                                                             |                    |                                       |                             |
| _____                                                             |                    |                                       |                             |
| _____                                                             |                    |                                       |                             |
| _____                                                             |                    |                                       |                             |

## Procedure details

Enema given? Home  Clinic  Inpatient

Repeat enema required? Yes  No

Distance reached (cm): \_\_\_\_\_

Landmarks visualised:

Dentate line  Lower rectal fold  Upper rectal fold

Rectosigmoid junction  Sigmoid

Number of air pumps delivered: \_\_\_\_\_

Quality of bowel prep Good  Average  Poor

(Good; more than 80% mucosa visible, Average; more than 50% mucosa visible, Poor; less than 30% mucosa visible)

Length of procedure (mins) \_\_\_\_\_

Normal study: Yes  No  (if no please answer below)

Lesions identified:

Tumour: \_\_\_\_\_ (describe features, size and location)

Adenoma \_\_\_\_\_ (size and location)

Inflammation present: Yes  No

Foreign body: \_\_\_\_\_

Proctological disease: \_\_\_\_\_ (e.g. haemorrhoids, fissure, fistula)

Biopsy performed? Yes  No

No of biopsies taken: \_\_\_\_\_

Confidence in suspected diagnosis: v. confident  Reasonably confident  Unsure  unable to make diagnosis

Images captured? Yes  No

Videos captured? Yes  No

Remote consultation required? Yes  No

No of attempts to connect \_\_\_\_\_

Delay in connection? Yes  No

Overall experience of RTC? Excellent  Good  Average  Poor

*If poor, please state reasons*

---

---

---

### Post procedure

Were there any patient related complications? Yes  No

If yes, please state \_\_\_\_\_

---

---

Were you able to reach a diagnosis? Yes  No

If not, please state reason: \_\_\_\_\_

---

---

Patient outcome:

Discharged, no treatment  Discharged with treatment started  Referred to secondary care

Referred for further investigation  Repeat appointment booked

Patient Reference ID \_\_\_\_\_

Name of endoscopist \_\_\_\_\_

GMC number \_\_\_\_\_

Grade \_\_\_\_\_

Signature \_\_\_\_\_

Chaperone name: \_\_\_\_\_

Chaperone signature \_\_\_\_\_

Name of virtual Proctor \_\_\_\_\_

PPE used? Yes  No

Report completed? Yes  No

GP letter sent? Yes  No

Concern about Covid-19 transmission? Yes  No

Device swabbed and sent for PCR? Yes  No

Table S1. Patient and Clinician responses to the post examination questionnaire of their experience with LumenEye®

| <b>Patient responses</b>                                                                                    |                   | <i>n</i> | <i>%</i> |
|-------------------------------------------------------------------------------------------------------------|-------------------|----------|----------|
| <i>More Comfortable than Expected</i>                                                                       | Strongly Disagree | 3        | 3%       |
|                                                                                                             | Disagree          | 6        | 6%       |
|                                                                                                             | Neutral           | 19       | 17%      |
|                                                                                                             | Agree             | 38       | 35%      |
|                                                                                                             | Strongly Agree    | 44       | 40%      |
| <i>Total responses</i>                                                                                      |                   | 110      |          |
| <i>The procedure was embarrassing or awkward</i>                                                            | Strongly Disagree | 36       | 32%      |
|                                                                                                             | Disagree          | 24       | 22%      |
|                                                                                                             | Neutral           | 22       | 20%      |
|                                                                                                             | Agree             | 18       | 16%      |
|                                                                                                             | Strongly Agree    | 11       | 10%      |
| <i>Total responses</i>                                                                                      |                   | 111      |          |
| <i>The doctor was gentle</i>                                                                                | Strongly Disagree | 3        | 3%       |
|                                                                                                             | Neutral           | 4        | 4%       |
|                                                                                                             | Agree             | 24       | 22%      |
|                                                                                                             | Strongly Agree    | 80       | 72%      |
| <i>Total responses</i>                                                                                      |                   | 111      |          |
| <i>I had enough privacy during the examination</i>                                                          | Strongly Disagree | 2        | 2%       |
|                                                                                                             | Neutral           | 3        | 3%       |
|                                                                                                             | Agree             | 43       | 39%      |
|                                                                                                             | Strongly Agree    | 63       | 57%      |
| <i>Total responses</i>                                                                                      |                   | 111      |          |
| <i>This examination is more convenient in the community</i>                                                 | Strongly Disagree | 2        | 2%       |
|                                                                                                             | Neutral           | 4        | 4%       |
|                                                                                                             | Agree             | 26       | 24%      |
|                                                                                                             | Strongly Agree    | 78       | 71%      |
| <i>Total responses</i>                                                                                      |                   | 110      |          |
| <i>Where would you rather have the examination</i>                                                          | Community         | 76       | 70%      |
|                                                                                                             | No Preference     | 28       | 26%      |
|                                                                                                             | Hospital          | 4        | 4%       |
| <i>Total responses</i>                                                                                      |                   | 108      |          |
| <i>I feel there is a benefit from early specialist input whilst awaiting an appointment in the hospital</i> | Strongly Disagree | 2        | 2%       |
|                                                                                                             | Neutral           | 5        | 5%       |
|                                                                                                             | Agree             | 25       | 23%      |
|                                                                                                             | Strongly Agree    | 78       | 71%      |
| <i>Total responses</i>                                                                                      |                   | 111      |          |
| <i>I was comfortable having my images shared with a specialist</i>                                          | Strongly Disagree | 2        | 2%       |
|                                                                                                             | Neutral           | 2        | 2%       |
|                                                                                                             | Agree             | 27       | 25%      |
|                                                                                                             | Strongly Agree    | 79       | 72%      |
| <i>Total responses</i>                                                                                      |                   | 110      |          |
| <i>I felt reassured my images were reviewed by a specialist</i>                                             | Neutral           | 2        | 2%       |
|                                                                                                             | Agree             | 24       | 22%      |
|                                                                                                             | Strongly Agree    | 84       | 76%      |

|                                                                                                     |                                                 |     |     |
|-----------------------------------------------------------------------------------------------------|-------------------------------------------------|-----|-----|
|                                                                                                     | <i>Total responses</i>                          | 110 |     |
| <i>LumenEye can benefit my health</i>                                                               | Neutral                                         | 4   | 4%  |
|                                                                                                     | Agree                                           | 27  | 25% |
|                                                                                                     | Strongly Agree                                  | 79  | 72% |
|                                                                                                     | <i>Total responses</i>                          | 110 |     |
| <i>I have undergone rigid sigmoidoscopy before</i>                                                  | Yes                                             | 24  | 22% |
|                                                                                                     | No                                              | 86  | 78% |
|                                                                                                     | <i>Total responses</i>                          | 110 |     |
| <i>How does LumenEye compare to your experience of rigid sigmoidoscopy</i>                          | Much worse                                      | 0   | 0%  |
|                                                                                                     | Worse                                           | 1   | 5%  |
|                                                                                                     | The same                                        | 4   | 19% |
|                                                                                                     | Better                                          | 5   | 24% |
|                                                                                                     | Much better                                     | 11  | 52% |
|                                                                                                     | <i>Total responses</i>                          | 21  |     |
| <i>If needed, I would be willing to undergo a further examination with a LumenEye</i>               | Strongly Disagree                               | 1   | 1%  |
|                                                                                                     | Neutral                                         | 4   | 4%  |
|                                                                                                     | Agree                                           | 31  | 28% |
|                                                                                                     | Strongly Agree                                  | 74  | 67% |
|                                                                                                     | <i>Total responses</i>                          | 110 |     |
| <i>Overall Opinion</i>                                                                              | Very Positive                                   | 87  | 79% |
|                                                                                                     | Positive                                        | 20  | 18% |
|                                                                                                     | Neutral                                         | 3   | 3%  |
|                                                                                                     | <i>Total responses</i>                          | 110 |     |
| <i>Visual analogue score of how comfortable (100) or uncomfortable (0) was LumenEye examination</i> | 0-24                                            | 6   | 6%  |
|                                                                                                     | 25-49                                           | 22  | 21% |
|                                                                                                     | 50-74                                           | 28  | 26% |
|                                                                                                     | 75-100                                          | 50  | 47% |
|                                                                                                     | <i>Total responses</i>                          | 106 |     |
|                                                                                                     | <b>Clinician responses</b>                      | n   | %   |
| <i>Were you able to make a diagnosis?</i>                                                           | Yes                                             | 91  | 80% |
|                                                                                                     | No                                              | 23  | 20% |
|                                                                                                     | <i>Total responses</i>                          | 114 |     |
| <i>Confidence in the suspected diagnosis</i>                                                        | Very confident                                  | 62  | 54% |
|                                                                                                     | Reasonably confident                            | 38  | 33% |
|                                                                                                     | Unsure                                          | 4   | 4%  |
|                                                                                                     | Unable to make diagnosis/incomplete examination | 9   | 8%  |
|                                                                                                     | No answer                                       | 1   | 1%  |
|                                                                                                     | <i>Total responses</i>                          | 114 |     |
| <i>Overall experience of LumenEye and CHiP</i>                                                      | Excellent                                       | 96  | 84% |
|                                                                                                     | Good                                            | 11  | 10% |
|                                                                                                     | Average                                         | 2   | 2%  |
|                                                                                                     | Poor                                            | 1   | 1%  |
|                                                                                                     | No answer (incomplete examination)              | 4   | 4%  |
|                                                                                                     | <i>Total responses</i>                          | 114 |     |



Figure S1 – ROC curve demonstrating the sensitivity and specificity of the LumenEye® for all pathology when compared with colonoscopy or flexible sigmoidoscopy (Gold Standard) findings (in 48 patients with subsequent colonoscopy or flexible sigmoidoscopy). Area Under Curve (AUC) = 81.9% (66.2-97.6%).

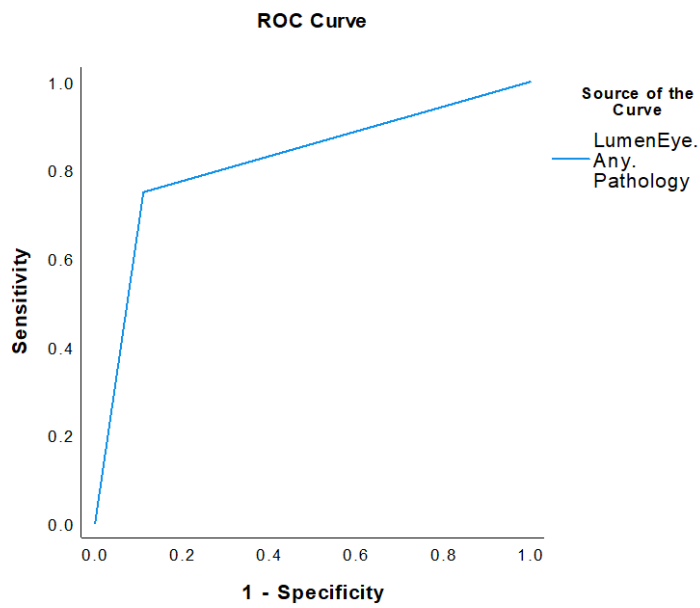

Supplement: K_10.3399BJGPO.2022.0036_supp.pdf [file K_10.3399BJGPO.2022.0036_supp.pdf]
